# Supplementary material for: The Role of the Ventromedial Prefrontal Cortex in Preferential Decisions for Own- and Other-Age Faces
Source: Front Psychol. 2022 Mar 11;13:822234. doi: 10.3389/fpsyg.2022.822234 (PMC8962742; doi:10.3389/fpsyg.2022.822234)
Supplement: Supplementary file 7 [file Table_3.xlsx]

## Sheet: Supplementary Table 3
Supplementary Table 3 Brain regions showing significant activation for own-age faces and other-age faces
Region (Brodmann's Area)	Coordinates			Z value	Cluster size
	x	y	z
Study 1
Own-age face vs. other-age face
Right fusiform gyrus (extending to inferior temporal gyrus)	44	-52	-14	6.8	5321
Left inferior occipital gyrus	-26	-92	0	5.99	2495
Left orbitofrontal cortex (extending to operculum)	-28	26	-14	5.67	786
Left brain stem (extending to the right side)	-4	-26	-10	5.57	2183
Left inferior frontal gyrus	-40	18	22	5.18	436
Right orbitofrontal cortex (extending to operculum)	36	28	-2	5.11	1448
Right middle cingulate gyrus	4	6	28	4.86	399
Right ventromedial prefrontal cortex (extending to right hemisphere)	8	44	-14	4.51	490
Other-age face vs. own-age face
no suprathreshold activation
Study 2
Own-age face vs. other-age face
Left superior frontal gyrus (extending to bilateral dorsomedial PFC)	-16	40	50	4.79	1244
Left ventromedial PFC (extending to right hemisphere)	-8	34	-16	4.34	554
Other-age face vs. own-age face
no suprathreshold activation
Study 3
Own-age face vs. other-age face
Right occipital gyrus (extending to left hemisphere)	12	-90	14	5.39	2551
Right white matter	42	-20	26	4.28	188
Other-age face vs. own-age face
no suprathreshold activation
Note. The threshold of significance was set at p < 0.05 at the cluster level (FWE corrected). The difference between Table 2 and Supplementary Table 3 was statistical threshold (peak-level FWE correction for Table 2 and cluster-level correction for Supplementary Table 3).
